1 **Facilitated event-related power-modulations during transcranial**  
2 **alternating current stimulation (tACS) revealed by concurrent**  
3 **tACS-MEG**

4 **Abbreviated title:** Facilitated event-related power modulations during  
5 tACS

6 Florian H. Kasten<sup>1,2</sup>, Burkhard Maess<sup>3</sup>, Christoph S. Herrmann<sup>1,2,4,\*</sup>

7 <sup>1</sup>Experimental Psychology Lab, Department of Psychology, European Medical School, Clus-  
8 ter for Excellence “Hearing for All”, Carl von Ossietzky University, Oldenburg, Germany

9 <sup>2</sup>Neuroimaging Unit, European Medical School, Carl von Ossietzky University, Oldenburg,  
10 Germany

11 <sup>3</sup>MEG and Cortical Networks Group, Max Planck Institute for Human Cognitive and Brain  
12 Sciences, Leipzig, Germany

13 <sup>4</sup>Research Center Neurosensory Science, Carl von Ossietzky University, Oldenburg, Germa-  
14 ny

15 \*Corresponding author:

16 Christoph S. Herrmann,

17 Experimental Psychology Lab, Carl von Ossietzky University,

18 Ammerländer Heerstr. 114 – 118,

19 26129, Oldenburg, Germany.

20 christoph.herrmann@uni-oldenburg.de, phone: +49 441 798 4936

21 Number of words: Abstract (244), Significance (119), Introduction (646), Discussion (1308)

22 Number of pages: 33

23 Number of Figures: 6

24 **Conflict of interest:** CSH has filed a patent application on brain stimulation and received  
25 honoraria as editor from Elsevier Publishers, Amsterdam. FHK and BM declare no competing  
26 interests.

27

28 **Keywords:** transcranial alternating current stimulation (tACS), MEG, online effects, event-  
29 related oscillations, cognitive performance

30

31 **Acknowledgements:**

32 The authors would like to thank Yvonne Wolf-Rosier for her invaluable efforts and assistance  
33 during data collection.

34 This research was supported by a grant of the German Research Foundation (Deutsche For-  
35 schungsgemeinschaft, DFG) awarded to Christoph S. Herrmann (DFG, SPP, 1665 HE  
36 3353/8-2).

37

38 **Abstract**

39 Non-invasive approaches to modulate oscillatory activity in the brain receive growing popu-  
40 larity in the scientific community. Transcranial alternating current stimulation (tACS) has been  
41 shown to modulate neural oscillations in a frequency specific manner. Due to a massive  
42 stimulation artifact at the targeted frequency, only little is known about effects of tACS during  
43 stimulation. I.e. it remains unclear how the continuous application of tACS affects event-  
44 related oscillations during cognitive tasks. Depending on whether tACS merely affects pre- or  
45 post-stimulus oscillations or both, stimulation can alter patterns of event-related oscillatory  
46 dynamics in various directions or may not affect them at all. Thus, knowledge about these  
47 directions is crucial to plan, predict and understand outcomes of solely behavioral tACS ex-  
48 periments. Here, a recently proposed procedure to suppress tACS artifacts by projecting  
49 MEG data into source space using spatial filtering was utilized to recover event-related pow-  
50 er modulations in the alpha band during a mental rotation task. MEG of twenty-five volun-  
51 teers was continuously recorded. After 10 minutes of baseline measurement, they received

52 either 20 minutes of tACS at individual alpha frequency or sham stimulation. Another 40  
53 minutes of MEG were acquired thereafter. Data were projected into source space and care-  
54 fully examined for residual artifacts. Results revealed strong facilitation of event-related pow-  
55 er modulations in the alpha band during tACS application. Data provide first direct evidence,  
56 that tACS does not counteract top-down suppression of intrinsic oscillations, but rather en-  
57 hances pre-existent power modulations within the range of the individual alpha (=stimulation)  
58 frequency.

59

### 60 **Significance**

61 Transcranial alternating current stimulation (tACS) is increasingly used in cognitive neurosci-  
62 ence to study the causal role of brain oscillations and cognition. However, online effects of  
63 tACS so far largely remain a ‘black box’ due to an intense electromagnetic artifact encoun-  
64 tered during stimulation. The current study is the first to employ a spatial filtering approach to  
65 recover and systematically study event-related oscillatory dynamics during tACS, which can  
66 potentially be altered in various directions. TACS facilitated pre-existing patterns of oscillato-  
67 ry dynamics during the employed mental rotation task, but does not counteract or overwrite  
68 them. In addition, control analysis and a measure to quantify tACS artifact suppression are  
69 provided that can enrich future studies investigating tACS online effects.

70 **1 Introduction**

71 Oscillatory activity of neuronal assemblies is an ubiquitous phenomenon in the brain ob-  
72 served within and between different brain structures and across species (Buzsáki, 2006).  
73 During the past decades these oscillations have been linked to a variety of brain functions  
74 such as memory, perception and cognitive performance (Klimesch, 1999; Basar et al., 2000;  
75 Buzsáki, 2006; Klimesch et al., 2007). Traditionally, these relationships were fruitfully investi-  
76 gated using imaging techniques such as Electro- or Magnetoencephalography (EEG/MEG).  
77 However, in their nature these approaches are correlational and cannot resolve causal rela-  
78 tionships between neural oscillations and cognitive processes. The recent (re-)discovery of  
79 non-invasive transcranial electrical stimulation (tES) now allows to directly probe these caus-  
80 al relationships (Herrmann et al., 2016b).

81 The application of oscillatory currents through the scalp by means of transcranial alternating  
82 current stimulation (tACS) has been shown to modulate endogenous brain oscillations in a  
83 frequency specific manner (Fröhlich and McCormick, 2010; Ozen et al., 2010; Zaehle et al.,  
84 2010; Helfrich et al., 2014). While effects of tACS during stimulation have been investigated  
85 in animals (Fröhlich and McCormick, 2010; Ozen et al., 2010; Kar et al., 2017) and computa-  
86 tional models (Fröhlich and McCormick, 2010; Reato et al., 2010; Ali et al., 2013), studies on  
87 tACS effects in humans have so far mostly been restricted to behavioral measures (Marshall  
88 et al., 2006; Kar and Krekelberg, 2014; Lustenberger et al., 2015), BOLD-signal effects  
89 (Alekseichuk et al., 2016; Cabral-Calderin et al., 2016; Voskuhl et al., 2016; Violante et al.,  
90 2017) and after-effects in the M/EEG (Zaehle et al., 2010; Wach et al., 2013; Neuling et al.,  
91 2015; Veniero et al., 2015; Vossen et al., 2015; Kasten et al., 2016). For the later, a frequen-  
92 cy specific increase in oscillatory power after stimulation is consistently reported (Zaehle et  
93 al., 2010; Neuling et al., 2013; Vossen et al., 2015; Kasten et al., 2016).

94 Besides outlasting effects on the power of spontaneous oscillations, tACS has more recently  
95 been demonstrated to alter event-related oscillatory dynamics in the context of a cognitive  
96 task (Kasten and Herrmann, 2017). In that study, event-related desynchronization (ERD) was  
97 enhanced after tACS application, accompanied by facilitated performance in a classic mental

98 rotation (MR) task (Shepard and Metzler, 1971; Kasten and Herrmann, 2017). The amount of  
99 ERD in the alpha band had previously been linked to MR performance (Michel et al., 1994;  
100 Klimesch et al., 2003). Although an increase in task performance was already observed dur-  
101 ing tACS, the precise oscillatory dynamics during tACS remain unclear (Kasten and  
102 Herrmann, 2017). An understanding of the effect of tACS on event-related oscillations is  
103 however crucial, given that many tACS-studies solely measure behavior. Depending on  
104 whether the stimulation merely affects pre- or post-stimulus oscillations or both, tACS may  
105 increase, decrease or not effect patterns of ERD/ERS with different behavioral outcomes to  
106 be expected. The current study aims to provide a first step towards understanding the effects  
107 of tACS on event-related power-modulations during stimulation. To this end, the experiment  
108 of Kasten and Herrmann (2017) was repeated in a MEG setup. The application of linearly  
109 constrained minimum variance beamforming (LCMV, Van Veen et al., 1997) on MEG record-  
110 ings has been shown to substantially suppress electromagnetic artifacts encountered during  
111 tES (Soekadar et al., 2013; Neuling et al., 2015). Although this approach will never complete-  
112 ly remove artifacts from the signal (Noury et al., 2016; Mäkelä et al., 2017; Noury and Siegel,  
113 2017), artifact suppression might still be sufficient to recover changes in event-related dy-  
114 namics during tACS (Neuling et al., 2017).

115 Here, this approach was utilized to recover the event-related power-modulations in the alpha  
116 band encountered during MR. Based on previous behavioral results, an increase in alpha  
117 power-modulation during tACS was hypothesized (Kasten and Herrmann, 2017). Measures  
118 to capture tACS effects were carefully chosen to be robust against the possible influence of  
119 residual artifacts in the data and control analyses were conducted to rule out that the ob-  
120 served effects can be attributed to a residual artifact.

## 121 **2 Methods**

### 122 **2.1 Participants**

123 Twenty-five healthy volunteers were randomly assigned to one out of two experimental con-  
124 ditions. They received either 20 minutes of tACS or sham stimulation throughout the course

125 of the experiment. All were right-handed according to the Edinburgh-handedness scale  
126 (Oldfield, 1971) and had normal or corrected to normal vision. Participants gave written in-  
127 formed consent prior to the experiment and reported no history of neurological or psychiatric  
128 conditions. The experiment was approved by the “*Commission for Research Impact As-*  
129 *essment and Ethics*” at the University of Oldenburg and conducted in accordance with the  
130 declaration of Helsinki. Three subjects exhibited low tolerance to skin or phosphene sensa-  
131 tions while determining the individual stimulation intensity (see section 2.3). Due to the result-  
132 ing low stimulation currents (below 0.4 mA) these subjects were excluded from the analysis.  
133 Furthermore, two participants were excluded as they did not exhibit alpha modulation in re-  
134 sponse to the cognitive task during the baseline block. Data of twenty subjects (10 in stimula-  
135 tion group 10 in sham, age:  $26 \pm 3$  years, 8 females) remained for analysis. Although exper-  
136 iment was initially counterbalanced for participants’ sex, the exclusion of subjects resulted in  
137 an imbalance in the sham group (7 males vs. 3 females, 5 males vs. 5 females in the stimu-  
138 lation group).

## 139 **2.2 Magnetoencephalogram**

140 Neuromagnetic activity was recorded at a rate of 1000 Hz using a 306 channel whole-head  
141 MEG system (Elekta Neuromag Vectorview, Elekta Oy, Helsinki, Finland) with 102 magne-  
142 tometers and 204 orthogonal, planar gradiometers, sampling from 102 distinct sensor loca-  
143 tions. An online band-pass filter between 0.1 Hz and 330 Hz was applied. The experiment  
144 was conducted in a dimly lit, magnetically shielded room (Vacuumschmelze, Hanau, Germa-  
145 ny) with participants seated below the MEG helmet in upright position. Three anatomical  
146 landmarks (nasion, left and right pre-auricular points), the location of five head position indi-  
147 cator (HPI) coils, as well as  $> 200$  head shape samples were digitized prior to the experiment  
148 for continuous head-position tracking and later co-registration with anatomical MRIs using a  
149 Polhemus Fastrack (Polhemus, Colchester, VT, USA).

150 After finishing the preparations, individual alpha frequency (IAF) was determined from a  
151 three-minute eyes-open resting state MEG recording. Data were segmented into 1 s epochs.  
152 Fast Fourier Transforms (FFTs) were computed for each of the segments using the Fieldtrip

153 toolbox (Oostenveld et al., 2011). The power peak of the averaged spectra in the 8-12 Hz  
154 band was visually identified based on a set of posterior sensors showing most pronounced  
155 alpha peaks and used as stimulation frequency in the subsequent procedures (see **Figure**  
156 **1A** for an overview of the time course of the experiment).

### 157 **2.3 Electrical stimulation**

158 Participants received either 20 minutes of tACS (including 10 s fade-in and fade-out) or sham  
159 stimulation (30 s stimulation in the beginning of the stimulation period, including 10 s fade-in  
160 and out) at their individual alpha frequency (IAF). The sinusoidal stimulation signal was digi-  
161 tally generated at a sampling rate of 10 kHz in Matlab 2012a (16-bit, The MathWorks Inc.,  
162 Natick, MA, USA) and transferred to a digital-analog converter (Ni USB, 6221, National In-  
163 struments, Austin, TX, USA). From there the signal was streamed to the remote input of a  
164 battery-driven constant current stimulator (DC Stimulator Plus, Neuroconn, Illmenau, Germa-  
165 ny), which was placed inside an electrically shielded cabinet outside the MSR. The signal  
166 was then gated into the MSR via a tube in the wall using the MRI extension-kit of the stimula-  
167 tor (Neuroconn, Illmenau, Germany). Stimulation was administered by two surface conduc-  
168 tive rubber electrodes attached to participants scalp over electrode positions Cz (5 x 7 cm)  
169 and Oz (4 x 4 cm) of the international 10-20 system (**Figure 1B**), using an adhesive, electri-  
170 cally conductive paste (ten20 conductive paste, Weaver and Co., USA). Impedance was kept  
171 below 20 k $\Omega$  (including two 5 k $\Omega$  resistors in the cables of the MRI extension-kit of the stimu-  
172 lator). Accordingly, impedance directly under the electrode was limited to 10 k $\Omega$ .

173 To minimize confounding influences from either phosphene or skin sensations, tACS was  
174 applied below participants' individual sensation threshold, using an established thresholding  
175 procedure (Neuling et al., 2013, 2015; Kasten et al., 2016; Kasten and Herrmann, 2017). To  
176 this end, participants were stimulated with an initial intensity of 500  $\mu$ A at their IAF. Depend-  
177 ing on whether participants noticed the initial stimulation, intensity was either increased or  
178 decreased in steps of 100  $\mu$ A until they noticed/not noticed the stimulation. The highest in-  
179 tensity at which participants did not notice the stimulation was later used as tACS intensity in  
180 the main experiment. The thresholding was performed for both groups in order to keep ex-

181 experimental procedures similar. The obtained intensities for the sham group were applied dur-  
182 ing the 30 s stimulation train in the beginning of the stimulation block (see above). Three par-  
183 ticipants exhibited sensation threshold below 400  $\mu\text{A}$  and were excluded from analysis. On  
184 average, participants were stimulated with  $715 \mu\text{A} \pm 301 \mu\text{A}$  (peak-to-peak; stimulation  
185 group:  $680 \mu\text{A} \pm 175 \mu\text{A}$ ) at a frequency of  $10.5 \text{ Hz} \pm 0.9 \text{ Hz}$ . TACS or sham stimulation was  
186 applied for 20 minutes during the second and third block of the behavioral experiment.

## 187 **2.4 Mental rotation task**

188 Visual stimuli were presented using Psychtoolbox 3 (Kleiner et al., 2007) implemented in the  
189 same Matlab script that generated the stimulation signal. Visual stimuli were rear-projected  
190 onto a screen inside the MSR at a distance of approx. 100 cm from the participant.

191 Subjects performed the same MR paradigm that was employed in a recent tACS-EEG study  
192 (Kasten and Herrmann, 2017). Stimuli were taken from an open-source stimulus set (Ganis  
193 and Kievit, 2015), comprised of 384 MR stimuli similar to the objects used in the seminal pa-  
194 per of Shepard and Metzler (1971). The duration of the experiment was reduced from 8 to 7  
195 blocks of 10 minutes each. Participants were familiarized with the task on a notebook during  
196 electrode preparation (16 practice trials with immediate feedback). All other parameters were  
197 kept similar. Each block consisted of 48 trials, starting with the presentation of a white fixa-  
198 tion cross at the center of the screen. After 3000 ms a MR stimulus was presented for anoth-  
199 er 7000 ms. During this time participants were asked to judge whether the two objects on  
200 screen were either identical (can be brought in alignment by rotating) or different (cannot be  
201 brought in alignment by rotating) by pressing a button with their left or right index finger (**Fig-**  
202 **ure 1C**). To keep visual stimulation at a constant level, the MR stimuli remained on screen  
203 for the whole 7000 ms, regardless of participants' reaction times. Every 24 trials, the task  
204 was interrupted by a one minute resting period during which a rotation of the fixation cross  
205 had to be detected. This ensured participants remained focused and tried to avoid head  
206 movements. The first block served as baseline measurement before stimulation. During the  
207 second and third block, tACS or sham stimulation was applied. The remaining four blocks



208 served as post stimulation measurements to capture aftereffects of the stimulation (**Figure**  
209 **1A**). The experiment had a total duration of 70 minutes.

## 210 **2.5 Debriefing**

211 After finishing the experiment, participants filled out a translated version of a questionnaire  
212 assessing commonly reported side effects of transcranial electrical stimulation (Brunoni et  
213 al., 2011). Subsequently, they were asked to indicate whether they believe they received  
214 tACS or sham stimulation. Finally, all subjects were informed about the aims of the experi-  
215 ment and their actual experimental condition.

## 216 **2.6 Data analysis**

217 Data analysis was performed using Matlab 2016a (The MathWorks Inc., Natick, MA, USA).

### 218 **2.6.1 Behavioral data**

219 Analysis of performance and reaction time (RT) data followed the approach of Kasten and  
220 Herrmann (2017). Performance in each block (48 Trials) in percent was calculated and nor-  
221 malized by pre-stimulation baseline to account for inter-individual differences. The resulting  
222 values reflect performance change in each block relative to baseline. RTs were averaged  
223 separately for each rotation angle and normalized by their respective baseline RT. The nor-  
224 malized RTs were then averaged over angles for each block. This procedure accounts for  
225 the known increase in RT with larger rotation angles (Shepard and Metzler, 1971).

### 226 **2.6.2 MEG processing and artifact suppression**

227 MEG data were offline resampled to 250 Hz and filtered between 1 and 40 Hz using a 4<sup>th</sup>  
228 order, two-pass Butterworth filter to approximate zero phase. Data were projected into  
229 source space by application of a linearly constrained minimum variance (LCMV) beamformer  
230 (Van Veen et al., 1997), a procedure that has been demonstrated to suppress artifacts origi-  
231 nating from transcranial electrical stimulation (Soekadar et al., 2013; Neuling et al., 2015).  
232 Filter coefficients were individually estimated for each block using the noise covariance ma-  
233 trix, an equally spaced (1.5 cm) 889 point grid warped into Montreal Neurological Institute

234 (MNI) space, and single-shell headmodels (Nolte, 2003), created from individual T1-weighted  
235 MRIs. MRIs were co-registered to the median head position in each block, estimated from  
236 continuous HPI signals using the Elekta Neuromag MaxFilter™ software (Elekta Oy, Helsin-  
237 ki, Finland). The signal-space-separation method (Taulu et al., 2005), offered by the software  
238 was not applied, as it apparently corrupted tACS artefact suppression after beamforming.  
239 Covariance matrices were estimated by segmenting each MEG recording into 2 s epochs.  
240 The regularization parameter  $\lambda$  for the LCMV beamformer was set to zero to ensure optimal  
241 artifact suppression as suggested by Neuling et al. (2017).  
242 Sensor space MEG data were segmented -5 s to 7 s around the onset of the MR stimuli.  
243 Epochs were then projected into sensor space using the previously obtained beamformer  
244 filters, resulting in 889 virtual channels, distributed over the brain. A time-frequency analysis  
245 was computed for all trials using Morlet-wavelets with a fixed width of 7 cycles. The resulting  
246 time-frequency spectra were subsequently averaged for each block.  
247 As mentioned above, all analysis procedures in this study were rigorously checked with re-  
248 spect to their robustness against influences from residual artifacts in the data (Noury et al.,  
249 2016; Neuling et al., 2017). This involved a careful choice of the measure used to capture  
250 event-related changes in oscillatory power. Traditionally, such changes have been evaluated  
251 using the concept of event-related (de-)synchronization (ERD/ERS), which has been defined  
252 by Pfurtscheller and Lopes Da Silva (1999) as:

$$253 \quad ERD/ERS = \frac{R-A}{R} * 100, \quad (1)$$

254 where  $R$  is the oscillatory power within the frequency band of interest during a reference pe-  
255 riod prior to stimulus onset and  $A$  is the power during a testing period after stimulus onset,  
256 respectively. However, assuming that residual tACS artifacts ( $R_{Res}$  and  $A_{Res}$ ) are equally con-  
257 tributing to  $R$  and  $A$ , this would change the equation in the following way:

$$258 \quad ERD/ERS = \frac{(R+R_{Res})-(A+A_{Res})}{(R+R_{Res})} * 100 \quad (2)$$

259 Given that the residuals in  $R$  and  $A$  are uncorrelated with the task and have approximately  
260 equal strength ( $R_{Res} \approx A_{Res}$ ), their influence cancels out in the numerator, but biases the de-

261 nominator of the equation, resulting in systematic underestimations of the observed power  
262 modulations:

$$263 \quad ERD/ERS = \frac{R-A}{(R+R_{Res})} * 100 \quad (3)$$

264 For this reason the pure difference between reference and testing period (for the sake of  
265 clarity in the following referred to as event-related power difference;  $ER\Delta_{Pow}$ ) was used to  
266 more accurately capture event-related power modulations in the current study:

$$267 \quad ER\Delta_{Pow} = (R + R_{Res}) - (A + A_{Res}) = R - A \quad (4)$$

268 Power in the individual alpha band (IAF  $\pm$  2 Hz) was extracted with reference and test period  
269 ranging from -2.5 s to -0.5 before and 0 s to 2 s after stimulus onset, respectively.

270 Performance of the artifact suppression was evaluated by estimating the size of the residual  
271 artifact relative to the brain oscillation of interest (see next section). As it will be described in  
272 more detail in the results section, the beamformer successfully suppressed the tACS artifact  
273 from approx. 2,500,000 times the size of human alpha oscillations down to a factor of  $< 3$ .

274 However, some 'hot spots' showing larger residual artifacts (1:10) are apparent in the prox-  
275 imity of stimulator cables and the central stimulation electrode. In order to avoid the inclusion  
276 of virtual channels in the analysis that contain strong residual artifacts, but no physiologically  
277 meaningful effects, brain areas showing strongest alpha power modulation in response to the  
278 onset of the MR-stimuli were localized based on the first (artifact-free) block prior to stimula-  
279 tion. To this end a dependent-sample random permutation cluster t-test (two-tailed) with  
280 5000 randomizations and Monte Carlo estimates to calculate  $p$ -values was run to compare  
281 power in the IAF-band between reference and test period during the baseline block. The test  
282 was performed on the whole sample (stimulation and sham group pooled). Clusters were  
283 thresholded at an  $\alpha$ -level of .01. The resulting significant negative cluster was used as ROI to  
284 extract the time course of  $ER\Delta_{Pow}$  from each block. To account for inter-individual differ-  
285 ences,  $ER\Delta_{Pow}$  in each block was normalized by  $ER\Delta_{Pow}$  in the baseline block before stimula-  
286 tion. In order to test whether the effects of tACS were specific to the alpha band the same  
287 analysis was performed on power modulations in the lower (IAF + 3 Hz to IAF + 11 Hz) and  
288 upper (IAF + 12 Hz to IAF + 20 Hz) beta band within the ROI.

### 289 **2.6.3 Evaluation of artifact suppression and control analyses**

290 As discussed earlier, the application of LCMV beamforming results in a strong, however im-  
291 perfect suppression of the tACS artifact (Noury et al., 2016; Mäkelä et al., 2017; Noury and  
292 Siegel, 2017). It is therefore crucial to characterize the achieved artifact suppression and to  
293 rule out that effects observed during stimulation result from residual artifacts in the data ra-  
294 ther than an effect of tACS on the brain.

295 In order to evaluate the artifact suppression achieved by the spatial filtering procedure, par-  
296 ticipants' alpha power ( $IAF \pm 2$  Hz) was extracted from the pre-stimulus interval of the base-  
297 line and the two stimulation blocks. The power in the baseline block provides an estimate of  
298 participants' natural, artifact-free alpha power that can be compared to the power encoun-  
299 tered during stimulation blocks before (on the sensor-level) and after beamforming (on the  
300 source-level). It is therefore possible to roughly estimate the size of the stimulation artifact  
301 relative to the brain signal of interest. This artifact-to-brain-signal-ratio was calculated for  
302 each magneto- and gradiometer channel as well as for each virtual channel after LCMV.  
303 While this measure is not able to disentangle brain signal/tACS effects from a residual arti-  
304 fact after LCMV, it can provide an upper boundary for the size of the residual artifact as well  
305 as its spatial distribution.

306 A major assumption of the presented analysis framework for event-related power modula-  
307 tions during tACS is that the (residual) artifact has similar strength during the pre- and post-  
308 stimulus intervals, such that its influence cancels out when contrasting (subtracting) the two  
309 intervals (equation 4). Previous studies have demonstrated that physiological processes  
310 such as heartbeat and respiration can result in impedance changes of body tissue and small  
311 body movements, which change the size of the tACS artifact (Noury et al., 2016; Noury and  
312 Siegel, 2017). To rule out that a similar modulation of artifact strength occurring in an event-  
313 related manner accounts for potential effects observed on the source level, a control analysis  
314 was carried out. To this end, sensor-level MEG time series during the two stimulation blocks  
315 were band-pass filtered around the stimulation frequency ( $IAF \pm 1$  Hz) and the signal enve-  
316 lope was extracted using a Hilbert transform. The envelope time-series was subsequently

317 segmented analogously to the  $ER\Delta_{Pow}$  analysis and demeaned. The difference in envelope  
318 amplitude during pre- (-2.5s to -0.5s) and post-stimulus interval (0 – 2 s) were compared by  
319 means of a random permutation cluster t-test with Monte Carlo estimates. To rule out that  
320 these differences drive the effects observed on the source-level, the envelope differences  
321 were correlated with the  $ER\Delta_{Pow}$  values obtained earlier. For comparison, the same analysis  
322 was performed for the stimulation and sham group. For the sham group, envelope differ-  
323 ences should reflect the event-related suppression of alpha power, commonly observed dur-  
324 ing mental rotation, and therefore highly correlate with the source level  $ER\Delta_{Pow}$ . Pre- /post-  
325 stimulus envelope differences in the stimulation group, however, should pre-dominantly re-  
326 flect changes in the tACS artifact. High correlations between sensor-space envelope differ-  
327 ences with source level  $ER\Delta_{Pow}$  would thus indicate that systematic modulations of the tACS  
328 artifact drive changes in  $ER\Delta_{Pow}$ , rather than an actual physiological effect of tACS.

#### 329 **2.6.4 Experimental design and statistical analysis**

330 Statistical analysis was realized in a 2 x 6 mixed-effects repeated measures design with the  
331 between subject factor *condition* (stimulation vs. sham) and the within subject factor *block* (6  
332 levels). The normalized behavioral (performance, RTs) and physiological ( $ER\Delta_{Pow}$ ) data were  
333 analyzed using repeated measures ANOVAs (rmANOVA). Greenhouse-Geisser corrected p-  
334 values are reported were appropriate. If significant interactions between *condition* and *block*  
335 were revealed, analysis was subsequently split into two separate rmANOVAs, one covering  
336 effects during stimulation (factors condition: stimulation vs. sham; block: block 2 vs. block 3),  
337 the other analyzing outlasting effects (factors condition: stimulation vs. sham; block: block 4 -  
338 block 7). Comparisons of single blocks were performed using two-sample t-tests. General-  
339 ized  $\eta^2$  and *Cohen's d* values are reported as measures of effect size. Pearson correlation  
340 coefficients were calculated to relate behavioral and physiological effects, as well as physio-  
341 logical effects and stimulation intensity.

342 Statistical analysis was performed using R 3.2.3 (The R Core Team, R Foundation for Statis-  
343 tical Computing, Vienna, Austria). Cluster based permutation tests on MEG data were per-

344 formed in Matlab 2016a using statistical functions implemented in the Fieldtrip toolbox  
345 (Oostenveld et al., 2011).

### 346 **3 Results**

#### 347 **3.1 Behavioral Results**

348 Welch two sample t-test yielded a trend for slightly better raw task performance in the base-  
349 line block for the sham group as compared to the stimulation group ( $t_{14.9} = -2.00$ ,  $p = .06$ ,  $d =$   
350  $.9$ ;  $M_{stim} = 87.3\%$ ,  $SD = 3.6\%$ ;  $M_{Sham} = 91.7\%$ ,  $SD = 5.9\%$ ). The rmANOVA on relative perfor-  
351 mance change revealed a significantly larger facilitation of mental rotation performance rela-  
352 tive to baseline in the *stimulation* group as compared to *sham* (*condition*:  $F_{1,18} = 4.93$ ,  $p = .04$ ,  
353  $\eta^2 = 0.14$ )

354 Analysis of RTs revealed a trend for the factor *block* ( $F_{5,90} = 2.47$ ,  $p = .07$ ,  $\eta^2 = 0.03$ ), but no  
355 effect of stimulation ( $F_{1,18} = 1.02$ ,  $p = .33$ ,  $\eta^2 = 0.04$ ). Results of the behavioral analysis are  
356 summarized in **Figure 2**.

#### 357 **3.2 Event-related alpha modulation**

358 Comparison of pre- and post-stimulus IAF-band power during the baseline block revealed a  
359 significant cluster in occipito-parietal areas ( $p_{cluster} < .001$ , **Figure 3A**) for the whole sample.  
360 The identified cluster was used as a ROI to extract the time-course of  $ER\Delta_{Pow}$  from the differ-  
361 ent blocks and to limit the subsequent analysis to physiologically meaningful brain regions.  
362 The subsequent rmANOVA revealed a significant main effect of *block* ( $F_{5,90} = 7.22$ ,  $p = .009$ ,  
363  $\eta^2 = .15$ ) as well as a significant *condition\*block* interaction ( $F_{5,90} = 6.81$ ,  $p = .011$ ,  $\eta^2 = .15$ ),  
364 and a trend for the main effect of *condition* ( $F_{1,18} = 3.62$ ,  $p = .07$ ,  $\eta^2 = .10$ ). Please refer to  
365 **Figure 3B** for an overview of the time course of relative  $ER\Delta_{Pow}$ . To further resolve the signif-  
366 icant interaction, separate rmANOVAs were performed on the data acquired during and after  
367 stimulation. This analysis exhibited a significant main effect of *condition* ( $F_{1,18} = 9.34$ ,  $p =$   
368  $.007$ ,  $\eta^2 = .27$ ) during stimulation, but not thereafter (*condition*:  $F_{1,18} = 0.14$ ,  $p = .71$ ,  $\eta^2 < .01$ ,  
369 **Figure 3C**). Furthermore, a significant effect of *block* ( $F_{3,54} = 3.55$ ,  $p = .02$ ,  $\eta^2 = .02$ ), as well  
370 as a significant *condition\*block* interaction ( $F_{3,54} = 3.10$ ,  $p = .034$ ,  $\eta^2 = .02$ ) were found in the

371 post-stimulation data. None of the other main effects or interactions reached significance. It  
372 was not possible to further resolve the significant *condition\*block* interaction during the post-  
373 stimulation blocks. Separately testing relative  $ER\Delta_{Pow}$  values of the two experimental groups  
374 against each other did not reveal significant differences for any of the blocks (all  $p > .12$ ,  
375 Welch two-sample t-test, one-tailed, uncorrected). Based on pure visual inspection, the effect  
376 appears to be driven by a group difference during the first block after stimulation (block 4,  
377 see **Figure 3B**), which might be indicative of a weak tACS aftereffect during this block. Refer  
378 to **Figure 4** for group-averaged time-frequency representations of participants' normalized  
379 alpha power change and the corresponding source-level topographies within the analyzed  
380 ROI.

381 A non-significant positive correlation between the increase in  $ER\Delta_{Pow}$  during stimulation and  
382 stimulation intensity was observed in the *stimulation* group ( $r = .40$ ,  $t_8 = 1.25$ ,  $p = .24$ ). A  
383 weak negative non-significant correlation was observed in the *sham* group ( $r = -.26$ ,  $t_8 = -$   
384  $0.78$ ,  $p = .45$ ; **Figure 3D**).

385 To test whether the effects of tACS were specific to the alpha band, the analysis was repeat-  
386 ed on event-related power modulations in the lower (IAF + 3 Hz to IAF + 11 Hz) and upper  
387 (IAF + 12 Hz to IAF + 20 Hz) beta band within the ROI. The rmANOVA for the lower beta  
388 band revealed a significant effect of *block* ( $F_{5,90} = 15.10$ ,  $p < .001$ ,  $\eta^2 = .17$ ) as well as a sig-  
389 nificant *condition\*block* interaction ( $F_{5,90} = 9.37$ ,  $p < .001$ ,  $\eta^2 = .11$ ). Two separate rmANOVAs  
390 testing the effects during and after stimulation, revealed a trend for the factor *condition* during  
391 stimulation ( $F_{1,18} = 4.17$ ,  $p = .056$ ,  $\eta^2 = .18$ ) as well as a significant effect of *block* ( $F_{1,18} =$   
392  $4.72$ ,  $p = .043$ ,  $\eta^2 = .02$ ). After stimulation only a trend for the factor *block* was found ( $F_{3,54} =$   
393  $2.28$ ,  $p = .09$ ,  $\eta^2 = .03$ ). No significant effects were found in the analysis of the upper beta  
394 band. **Figure 3E,F** summarize results for the lower and upper beta band analysis (all  $p > .1$ ).

395 There were no significant correlations between relative  $ER\Delta_{Pow}$  and change in task perfor-  
396 mance during ( $r_{online} = .3$ ,  $t_{18} = 1.37$ ,  $p = .18$ ) or after stimulation ( $r_{offline} = .11$ ,  $t_{18} = 0.49$ ,  $p =$   
397  $.62$ ). Descriptively the correlation was higher for the sham group during both during and after  
398 stimulation ( $r_{Sham/online} = .51$ ,  $t_8 = 1.67$ ,  $p = .13$ ;  $r_{Sham/offline} = .54$ ,  $t_8 = 1.83$ ,  $p = .1$ ) as compared

399 to the stimulation group ( $r_{Stim/online} = .09$ ,  $t_8 = 0.27$ ,  $p = .8$ ;  $r_{Stim/offline} = -.16$ ,  $t_8 = -0.45$ ,  $p = .67$ ;  
400 **Figure 3G,H**).

### 401 **3.3 Control Analyses**

402 To rule that the strikingly strong facilitation of power-modulations in the alpha band is driven  
403 by residual artifacts, some control analyses were performed. In a first step, the performance  
404 of the artifact suppression achieved by LCMV was evaluated. To this end, the ratio of pre-  
405 stimulus alpha power during the (tACS-free) baseline block and the two tACS blocks was  
406 compared in sensor and source space. In the sensor-space, this artifact-to-brain-signal-ratio  
407 was on average 2,534,000:1 in block 2 and 2,569,000:1 in block 3 (average over all sensors  
408 and subjects). After LCMV beamforming the ratio was reduced to 2.72:1 in block 2 and  
409 3.13:1 in block 3 (average over virtual sensors and subjects). The largest ratio observed in a  
410 single virtual channel of one subject after beamforming was 93.42:1. **Figure 5** illustrates the  
411 spatial distribution of the alpha to artifact ratio on the source level. The ratio is highest in cen-  
412 tral areas, covered by stimulation electrodes and cables. Outside these areas the ratio is  
413 substantially smaller and falls within a physiologically plausible range for alpha band oscilla-  
414 tions ( $< 3:1/4:1$ ). Overall artifact suppression appears to be slightly worse during block 3 as  
415 compared to block 2.

416 The event-related envelope of the sham group reflects the typical pattern of alpha power  
417 decrease after stimulus onset in the MR task in both sensor types. This was supported by the  
418 permutation cluster analysis, which revealed significant positive clusters in the magnetometer  
419 and the gradiometer data ( $p_{cluster} < .001$ , **Figure 6A,C**; significant sensors are marked by  
420 black dots). This was further supported by the high correlation between source-level power  
421 modulation and envelope difference of magnetometer ( $r = .96$ ,  $t_8 = 10.17$ ,  $p < .001$ , **Figure**  
422 **6B**) and gradiometer channels ( $r = .88$ ,  $t_8 = 5.23$ ,  $p < .001$ ; **Figure 6D**). In the stimulation  
423 group time-course and topography of the envelope overall exhibits a reversed pattern with  
424 lower amplitudes before stimulus onset and increased amplitude thereafter. In addition, the  
425 envelope time-course of gradiometers shows a prominent rhythmic activity in the range of 1  
426 to 2 Hz. Such modulations could potentially reflecting heart-beat related modulations (Noury



427 et al., 2016). However, given that this rhythmic activity was only observed in one sensor type  
428 and in a relatively systematic manner, might be more likely to reflect a technical artifact. Im-  
429 portantly, no such rhythmic modulation was evident in the time-frequency representations  
430 after LCMV (**Figure 4**). Results of the cluster analysis revealed positive clusters in the gradi-  
431 ometer data in only a few frontal sensors ( $p_{cluster} < .05$ , **Figure 6**, top left) as well as positive  
432 and negative clusters for some magnetometer channels ( $p_{cluster} < .05$ ). No significant correla-  
433 tion between the observed source-level power modulations and the sensor level envelope  
434 differences in magnetometer ( $r = .13$ ,  $t_8 = 0.37$ ,  $p = .72$ ) or gradiometer sensors ( $r = .26$ ,  $t_8 =$   
435  $0.75$ ,  $p = .47$ ) was evident. Overall, results do not support the idea that the effects observed  
436 on the source level can be explained by systematic, task-related changes in artifact strength.  
437 Only very few channels exhibit significant task-related power modulations, which, in addition,  
438 rather seem so show a reversed pattern of artifact modulation as compared to the source  
439 level data.

#### 440 **4 Discussion**

441 So far, only few studies investigated the effects of tACS on oscillatory activity in the human  
442 brain *during* stimulation (Helfrich et al., 2014; Voss et al., 2014; Ruhnau et al., 2016). The  
443 current findings add to this line of research by characterizing how event-related oscillatory  
444 activity in the brain reacts to externally applied perturbations in the same frequency band  
445 during cognitive tasks.

446 Results show that, rather than counteracting or overwriting the event-related down-regulation  
447 of oscillatory power during the MR task, tACS facilitated the pre-existing difference between  
448 pre- and post-stimulus power in the alpha band. Although this finding converges with obser-  
449 vations of facilitated ERD after tACS (Kasten and Herrmann, 2017), it is important to empha-  
450 size that online effects of tACS cannot directly be inferred from after-effects. While computa-  
451 tional models and animal experiments suggest entrainment as the core mechanism for tACS  
452 online effects (Fröhlich and McCormick, 2010; Ozen et al., 2010; Reato et al., 2010), there is  
453 increasing evidence that after-effects of tACS might be better explained by mechanisms of  
454 neural plasticity (Zaehle et al., 2010; Vossen et al., 2015). Different mechanisms of action

455 could in principle lead to different effects of tACS on event-related oscillations during and  
456 after stimulation, rendering direct observations of tACS online effects inevitable to accurately  
457 predict and to understand behavioral outcomes in tACS experiments.

458 The observed enhancement of event-related alpha power modulation explains previous re-  
459 sults of better performance in the MR task already during tACS (Kasten and Herrmann,  
460 2017), but contradicts with observations of Neuling et al. (2015). That study reported a ten-  
461 dency for reduced alpha desynchronization elicited by a passive visual task during tACS.  
462 However, authors calculated relative change (computed similar to ERD/ERS) to capture  
463 event-related alpha desynchronization, which is more vulnerable to residual artifacts in the  
464 data. As shown in **Equation 2 and 3**, such a residual leads to a biased (larger) denominator,  
465 resulting in systematic underestimations of event-related desynchronization (ERD) within the  
466 stimulated frequency band. Using the absolute power difference (here termed  $ER\Delta_{Pow}$ ) be-  
467 tween two time intervals within the same stimulation condition (i.e. pre-/post-stimulus alpha  
468 power) appears to be a more robust measure to capture online effects of tACS. Here, the  
469 residual artifact cancels out during the subtraction process. Importantly, this cancelation as-  
470 sumes that the strength of the residual is relatively stable between conditions and uncorre-  
471 lated with the task. Such systematic modulations could in principle occur if the task elicits  
472 systematic changes in physiological processes like heart-beat, respiration, or skin conduct-  
473 ance (Noury et al., 2016). While there was no evidence for such a systematic change in arti-  
474 fact strength that could explain the observed pattern in the current data, this fact has to be  
475 taken into account e.g. when using stimuli that can elicit stronger physiological responses  
476 (i.e. emotional pictures, demanding motor tasks). However, the impact of these modulations  
477 on the artifact suppression as compared to the size of the physiological effect on the brain  
478 has not been thoroughly characterized yet.

479 In addition to the observed effect of tACS on power modulations in the alpha band, data re-  
480 vealed a trend towards increased event-related power modulations in the lower beta band  
481 during tACS. On the one hand, this observation could be indicative of a rather unspecific  
482 effect of tACS (Kleinert et al., 2017), on the other hand the effect in the lower beta band

483 might reflect entrainment or resonance phenomena at the first harmonic of subjects' stimula-  
484 tion frequency (Herrmann, 2001; Herrmann et al., 2016a).

485 Contradicting with our previous finding of a prolonged ERD increase in the alpha band after  
486 tACS (Kasten and Herrmann, 2017) and despite the massive online effects, only a short-  
487 lasting after-effect during the first block after stimulation can be observed, if at all. Several  
488 studies successfully showed outlasting effects of tACS on alpha power during rest (i.e.  
489 Kasten et al., 2016; Neuling et al., 2013; Veniero et al., 2015; Vossen et al., 2015). A possi-  
490 ble explanation for this lack of a sustained outlasting tACS effect might be that stimulation  
491 intensity was relatively low as compared to the aforementioned experiments.

492 Similar to our previous study a significantly stronger increase in mental rotation performance  
493 was observed in the stimulation group as compared to sham. Unfortunately, it cannot be  
494 ruled out that this effect might have partly been driven by differences in participants' baseline  
495 performance and ceiling effects in the two groups. This could also explain the absence of  
496 previously observed correlations between performance increase and facilitated alpha power  
497 modulation (Kasten and Herrmann, 2017), that would have further supported the physiologi-  
498 cal findings. While such ceiling effects would render the current behavioral results uninforma-  
499 tive, they do not contradict the physiological effects, which were the main focus of the current  
500 study. Mental rotation tasks induce comparably long lasting event related power modulations  
501 (Michel et al., 1994), which is a beneficial property when studying tACS effects on event-  
502 related oscillations. In the current experiment, this came at the cost of overall high task per-  
503 formance in both groups. Future studies might therefore benefit from more difficult mental  
504 rotation paradigms (i.e. only including large rotation angles).

505 Apart from insights to online effects of tACS on event-related oscillations, the current study  
506 made an attempt to quantify the artifact suppression capabilities of LCMV beamforming. To  
507 this end, power around the stimulated frequency during tACS was compared to an artifact  
508 free estimate of participants' natural brain signal (alpha power). This allows to estimate the  
509 size of the stimulation artifact relative to the brain signal of interest before and after artifact  
510 suppression. In the current study, this artifact-to-brain-signal-ratio was suppressed from more

511 than 2,500,000:1 to approximately 3:1, with stronger artifacts around stimulation electrodes  
512 and cables (approx. 10:1). Since the power values obtained during stimulation will always  
513 contain a mixture of residual tACS artifact and brain signal, this ratio can only provide an  
514 upper boundary for the size of the residual artifact. Alpha power increases up to 300-400%  
515 fall into a physiologically plausible range for spontaneous alpha power changes or tACS ef-  
516 fects, as they are observed i.e. in studies on tACS after-effects (Neuling et al., 2013; Kasten  
517 and Herrmann, 2017; Stecher et al., 2017). The artifact-to-brain-signal-ratio might neverthe-  
518 less be a useful tool for future studies to assess whether a residual artifact falls within the  
519 same order of magnitude as the brain signal of interest and could also be used to evaluate  
520 and optimize the performance of artifact suppression approaches i.e. by tuning relevant pa-  
521 rameters. So far artifact suppression approaches have mostly been evaluated subjectively,  
522 i.e. by inspecting raw time series, (time-)frequency spectra or ERPs (Helfrich et al., 2014;  
523 Neuling et al., 2015; Witkowski et al., 2016). The artifact-to-brain-signal-ratio provides a more  
524 objective evaluation of the artifact size relative to the brain signal of interest, which is scale  
525 free and thus also allows easy comparison of different artifact suppression approaches with  
526 different measurement modalities (EEG/MEG, LCMV, template subtraction etc.). In addition,  
527 the mapping of residual artifact strength allows to check for overlap between ‘hot spots’ of  
528 residual artifacts and regions of interest.

529 The findings presented in the study provide first direct insights to online effects of tACS on  
530 event-related oscillations in humans. The effects were investigated using a rather simplistic  
531 approach utilizing only two conditions (stimulation vs. sham) and one stimulation frequency  
532 targeting posterior alpha oscillations with a Cz-Oz montage. This path was chosen to first  
533 establish an analysis and control analysis framework for the investigation of tACS online ef-  
534 fects on event-related oscillations, before approaching more complex designs, requiring larg-  
535 er sample sizes and higher computational efforts. TACS experiments generally allow for a  
536 multitude of control and contrast conditions including alternative electrode montages and  
537 frequencies. The current study can therefore neither resolve frequency nor montage speci-  
538 ficity of tACS effects. However, with the present results and the proposed analysis pipeline

539 the current study provides a starting point paving the way to further investigate montage and  
540 frequency specificity of tACS effects on event-related oscillatory dynamics during various  
541 cognitive tasks.

## 542 **5 Author contributions**

543 FHK, BM and CSH conceived the study and wrote the manuscript. FHK and BM collected the  
544 data. FHK analyzed the data. BM and CSH provided equipment and funding for the study.

## 545 **6 References**

546 Alekseichuk I, Diers K, Paulus W, Antal A (2016) Transcranial electrical stimulation of the  
547 occipital cortex during visual perception modifies the magnitude of BOLD activity: A  
548 combined tES–fMRI approach. *Neuroimage* 140:110–117.

549 Ali MM, Sellers KK, Frohlich F (2013) Transcranial Alternating Current Stimulation Modulates  
550 Large-Scale Cortical Network Activity by Network Resonance. *J Neurosci* 33:11262–  
551 11275.

552 Basar E, Basar-Eroglu C, Karakas S, Schürmann M (2000) Brain oscillations in perception  
553 and memory. *Int J Psychophysiol* 35:95–124.

554 Brunoni AR, Amadera J, Berbel B, Volz MS, Rizzerio BG, Fregni F (2011) A systematic  
555 review on reporting and assessment of adverse effects associated with transcranial  
556 direct current stimulation. *Int J Neuropsychopharmacol* 14:1133–1145.

557 Buzsáki G (2006) *Rhythms of the Brain*. Oxford University Press.

558 Cabral-Calderin Y, Williams KA, Opitz A, Dechent P, Wilke M (2016) Transcranial alternating  
559 current stimulation modulates spontaneous low frequency fluctuations as measured with  
560 fMRI. *Neuroimage* 141:88–107.

561 Fröhlich F, McCormick DA (2010) Endogenous Electric Fields May Guide Neocortical  
562 Network Activity. *Neuron* 67:129–143.

563 Ganis G, Kievit R (2015) A New Set of Three-Dimensional Shapes for Investigating Mental

- 564           Rotation Processes: Validation Data and Stimulus Set. *J Open Psychol Data* 3.
- 565    Helfrich RF, Schneider TR, Rach S, Trautmann-Lengsfeld SA, Engel AK, Herrmann CS  
566           (2014) Entrainment of Brain Oscillations by Transcranial Alternating Current Stimulation.  
567           *Curr Biol* 24:333–339.
- 568    Herrmann CS (2001) Human EEG responses to 1-100 Hz flicker: resonance phenomena in  
569           visual cortex and their potential correlation to cognitive phenomena. *Exp brain Res*  
570           137:346–353.
- 571    Herrmann CS, Murray MM, Ionta S, Hutt A, Lefebvre J (2016a) Shaping Intrinsic Neural  
572           Oscillations with Periodic Stimulation. *J Neurosci* 36:5328–5337.
- 573    Herrmann CS, Strüber D, Helfrich RF, Engel AK (2016b) EEG oscillations: From correlation  
574           to causality. *Int J Psychophysiol* 103:12–21.
- 575    Kar K, Duijnhouwer J, Krekelberg B (2017) Transcranial Alternating Current Stimulation  
576           Attenuates Neuronal Adaptation. *J Neurosci* 37:2325–2335.
- 577    Kar K, Krekelberg B (2014) Transcranial Alternating Current Stimulation Attenuates Visual  
578           Motion Adaptation. *J Neurosci* 34:7334–7340.
- 579    Kasten FH, Dowsett J, Herrmann CS (2016) Sustained Aftereffect of  $\alpha$ -tACS Lasts Up to 70  
580           min after Stimulation. *Front Hum Neurosci* 10:1–9.
- 581    Kasten FH, Herrmann CS (2017) Transcranial Alternating Current Stimulation (tACS)  
582           Enhances Mental Rotation Performance during and after Stimulation. *Front Hum*  
583           *Neurosci* 11:1–16.
- 584    Kleiner M, Brainard DH, Pelli DG, Broussard C, Wolf T, Niehorster D (2007) What's new in  
585           Psychtoolbox-3? *Perception* 36:S14.
- 586    Kleinert M-L, Szymanski C, Müller V (2017) Frequency-Unspecific Effects of  $\theta$ -tACS Related  
587           to a Visuospatial Working Memory Task. *Front Hum Neurosci* 11:1–16.
- 588    Klimesch W (1999) EEG alpha and theta oscillations reflect cognitive and memory

- 589 performance: A review and analysis. *Brain Res Rev* 29:169–195.
- 590 Klimesch W, Sauseng P, Gerloff C (2003) Enhancing cognitive performance with repetitive  
591 transcranial magnetic stimulation at human individual alpha frequency. *Eur J Neurosci*  
592 17:1129–1133.
- 593 Klimesch W, Sauseng P, Hanslmayr S (2007) EEG alpha oscillations: The inhibition-timing  
594 hypothesis. *Brain Res Rev* 53:63–88.
- 595 Lustenberger C, Boyle MR, Foulser AA, Mellin JM, Fröhlich F (2015) Functional role of  
596 frontal alpha oscillations in creativity. *Cortex* 67:74–82.
- 597 Mäkelä N, Sarvas J, Ilmoniemi RJ (2017) Proceedings #17. A simple reason why  
598 beamformer may (not) remove the tACS-induced artifact in MEG. *Brain Stimul* 10:e66–  
599 e67.
- 600 Marshall L, Helgadóttir H, Mölle M, Born J (2006) Boosting slow oscillations during sleep  
601 potentiates memory. *Nature* 444:610–613.
- 602 Michel CM, Kaufman L, Williamson SJ (1994) Duration of EEG and MEG  $\alpha$  Suppression  
603 Increases with Angle in a Mental Rotation Task. *J Cogn Neurosci* 6:139–150.
- 604 Neuling T, Rach S, Herrmann CS (2013) Orchestrating neuronal networks: sustained after-  
605 effects of transcranial alternating current stimulation depend upon brain states. *Front*  
606 *Hum Neurosci* 7:161.
- 607 Neuling T, Ruhnau P, Fuscà M, Demarchi G, Herrmann CS, Weisz N (2015) Friends, not  
608 foes: Magnetoencephalography as a tool to uncover brain dynamics during transcranial  
609 alternating current stimulation. *Neuroimage* 118:406–413.
- 610 Neuling T, Ruhnau P, Weisz N, Herrmann CS, Demarchi G (2017) Faith and oscillations  
611 recovered: On analyzing EEG/MEG signals during tACS. *Neuroimage* 147:960–963.
- 612 Nolte G (2003) The magnetic lead field theorem in the quasi-static approximation and its use  
613 for magnetoencephalography forward calculation in realistic volume conductors. *Phys*

- 614 Med Biol 48:3637–3652.
- 615 Noury N, Hipp JF, Siegel M (2016) Physiological processes non-linearly affect  
616 electrophysiological recordings during transcranial electric stimulation. *Neuroimage*  
617 140:99–109.
- 618 Noury N, Siegel M (2017) Phase properties of transcranial electrical stimulation artifacts in  
619 electrophysiological recordings. *Neuroimage* 158:406–416.
- 620 Oldfield RC (1971) The assessment and analysis of handedness: The Edinburgh inventory.  
621 *Neuropsychologia* 9:97–113.
- 622 Oostenveld R, Fries P, Maris E, Schoffelen JM (2011) FieldTrip: Open source software for  
623 advanced analysis of MEG, EEG, and invasive electrophysiological data. *Comput Intell*  
624 *Neurosci* 2011:1–9.
- 625 Ozen S, Sirota A, Belluscio MA, Anastassiou CA, Stark E, Koch C, Buzsaki G (2010)  
626 Transcranial Electric Stimulation Entrain Cortical Neuronal Populations in Rats. *J*  
627 *Neurosci* 30:11476–11485.
- 628 Pfurtscheller G, Lopes Da Silva FH (1999) Event-related EEG/MEG synchronization and  
629 desynchronization: Basic principles. *Clin Neurophysiol* 110:1842–1857.
- 630 Reato D, Rahman A, Bikson M, Parra LC (2010) Low-Intensity Electrical Stimulation Affects  
631 Network Dynamics by Modulating Population Rate and Spike Timing. *J Neurosci*  
632 30:15067–15079.
- 633 Ruhnau P, Neuling T, Fuscá M, Herrmann CS, Demarchi G, Weisz N (2016) Eyes wide shut:  
634 Transcranial alternating current stimulation drives alpha rhythm in a state dependent  
635 manner. *Sci Rep* 6:27138.
- 636 Shepard RN, Metzler J (1971) Mental rotation of three-dimensional objects. *Science*  
637 171:701–703.
- 638 Soekadar SR, Witkowski M, Cossio EG, Birbaumer N, Robinson SE, Cohen LG (2013) In



- 639 vivo assessment of human brain oscillations during application of transcranial electric  
640 currents. *Nat Commun* 4:2032.
- 641 Stecher HI, Pollok TM, Strüber D, Sobotka F, Herrmann CS (2017) Ten Minutes of  $\alpha$ -tACS  
642 and Ambient Illumination Independently Modulate EEG  $\alpha$ -Power. *Front Hum Neurosci*  
643 11:1–10.
- 644 Taulu S, Simola J, Kajola M (2005) Applications of the signal space separation method. *IEEE*  
645 *Trans Signal Process* 53:3359–3372.
- 646 Van Veen BD, Van Drongelen W, Yuchtman M, Suzuki A (1997) Localization of brain  
647 electrical activity via linearly constrained minimum variance spatial filtering. *IEEE Trans*  
648 *Biomed Eng* 44:867–880.
- 649 Veniero D, Vossen A, Gross J, Thut G (2015) Lasting EEG/MEG Aftereffects of Rhythmic  
650 Transcranial Brain Stimulation: Level of Control Over Oscillatory Network Activity. *Front*  
651 *Cell Neurosci* 9:477.
- 652 Violante IR, Li LM, Carmichael DW, Lorenz R, Leech R, Hampshire A, Rothwell JC, Sharp  
653 DJ (2017) Externally induced frontoparietal synchronization modulates network  
654 dynamics and enhances working memory performance. *Elife* 6.
- 655 Voss U, Holzmann R, Hobson A, Paulus W, Koppehele-Gossel J, Klimke A, Nitsche M a  
656 (2014) Induction of self awareness in dreams through frontal low current stimulation of  
657 gamma activity. *Nat Neurosci* 17:810–812.
- 658 Vossen A, Gross J, Thut G (2015) Alpha Power Increase After Transcranial Alternating  
659 Current Stimulation at Alpha Frequency ( $\alpha$ -tACS) Reflects Plastic Changes Rather Than  
660 Entrainment. *Brain Stimul* 8:499–508.
- 661 Voskuhl J, Huster RJ, Herrmann CS (2016) BOLD signal effects of transcranial alternating  
662 current stimulation (tACS) in the alpha range: A concurrent tACS–fMRI study.  
663 *Neuroimage* 140:118–125.

664 Wach C, Krause V, Moliadze V, Paulus W, Schnitzler A, Pollok B (2013) Effects of 10Hz and  
665 20Hz transcranial alternating current stimulation (tACS) on motor functions and motor  
666 cortical excitability. Behav Brain Res 241:1–6.

667 Witkowski M, Garcia-Cossio E, Chander BS, Braun C, Birbaumer N, Robinson SE, Soekadar  
668 SR (2016) Mapping entrained brain oscillations during transcranial alternating current  
669 stimulation (tACS). Neuroimage 140:89–98.

670 Zaehle T, Rach S, Herrmann CS (2010) Transcranial Alternating Current Stimulation  
671 Enhances Individual Alpha Activity in Human EEG. PLoS One 5:13766.

672

## 673 7 Figure Captions

674 **Figure 1: Experimental Procedures. (A)** Time course of the experiment. Blue color indi-  
675 cates periods during which the MR task was performed, grey indicates intermitting resting  
676 periods. **(B)** Positions of stimulation electrodes (red/blue) and layout of MEG sensory (yel-  
677 low). Stimulation electrodes were placed centered above Cz (7 x 5 cm) and Oz (4 x 4 cm) of  
678 the international 10-10 system. MEG was recorded from 102 locations. Each location con-  
679 tains a sensor triplet of one magnetometer and two orthogonal planar gradiometers, resulting  
680 in a total of 306 channels. **(C)** Mental rotation task. Each trial started with the presentation of  
681 a white fixation cross at the center of the screen. After 3000 ms a mental rotation stimulus  
682 was presented and remained on screen for another 7000 ms. During this time participants  
683 were required to judge whether the two objects presented were either different (example de-  
684 picted in 2<sup>nd</sup> display) or identical (only rotated, 4<sup>th</sup> display). **A** and **C** are adapted from Kasten  
685 and Herrmann (2017).

686

687 **Figure 2: Behavioral results. (A)** Change in task performance for *stimulation* and *sham*  
688 group relative to baseline pooled over all experimental blocks. Error bars depict standard  
689 error of the mean (*S.E.M.*). Asterisks code for significance ( $* < .05$ ). **(B)** Change in task per-  
690 formance relative to baseline for *stimulation* and *sham* group depicted over experimental

691 blocks. The grey area indicates blocks that were performed during tACS or sham stimulation.  
692 **(C)** Change in RT for *stimulation* and *sham* group relative to baseline pooled over experi-  
693 mental blocks. **(D)** Change in RT for *stimulation* and *sham* group relative to baseline depicted  
694 over experimental blocks. Grey area indicates blocks that were performed during tACS or  
695 sham stimulation.

696

697 **Figure 3: Event-related alpha power modulation. (A)** Region of interest (ROI). Significant  
698 cluster (pre- vs. post-stimulus power) in the IAF-band during the first block prior to tACS or  
699 sham stimulation, computed pooled on the whole sample ( $p_{cluster} < .001$ ). Topographies de-  
700 pict t-values mapped on an MNI standard surface. Statistical maps are thresholded at  $\alpha <$   
701  $.01$ . The depicted cluster was used as ROI to extract the time course of alpha power modula-  
702 tion relative to baseline over blocks from the virtual channels. **(B)** Relative alpha power mod-  
703 ulation within ROI depicted for each block. The grey area indicates blocks during tACS or  
704 sham stimulation. Shaded areas represent standard error of the mean (*S.E.M.*). Dashed line  
705 depicts baseline level. **(C)** Relative alpha modulation during tACS or sham (online) and after  
706 stimulation (offline). Error bars represent *S.E.M.*, asterisks code for significant differences ( $*$   
707  $< .05$ ). **(D)** Relative alpha modulation during stimulation correlated with stimulation intensity.  
708 Each point represents a single subjects' stimulation amplitude and relative alpha power  
709 modulation averaged over the two stimulation blocks (block 2 and 3). Please note that a  
710 stimulation intensity was determined for all participants (including sham). However, only for  
711 participants in the stimulation group this intensity was continuously applied during block 2  
712 and 3 **(E)** Relative power modulation in the lower beta band (IAF + 3 Hz to IAF + 11 Hz) with-  
713 in the ROI for each block. **(F)** Relative power modulation in the higher beta band (IAF + 12  
714 Hz to IAF + 20 Hz) within the ROI for each block. **(G+H)** Correlation between change in task  
715 performance and relative alpha power modulation during **(G)** and after tACS **(H)**. High, albeit  
716 non-significant correlations are only evident for the sham, but not the stimulation group.

717

718 **Figure 4: Normalized, baseline-subtracted TFRs and source topographies.** TFRs and  
719 source topographies for *stimulation* (**Top Rows**) and *sham* group. (**Bottom Rows**). TFRs  
720 were aligned at IAF and averaged over subjects in each group. The range from -2.5 to -0.5  
721 prior to stimulus onset (white bar) served as reference period for baseline subtraction. Spec-  
722 tra were subsequently normalized by the power difference in the alpha band ( $IAF \pm 2Hz$ ) dur-  
723 ing the baseline block (block 1) prior to stimulation. Normalization was performed such that  
724 the data presented resemble data in the statistical analysis. Blocks 2 and 3 (dark grey) rep-  
725 resent data acquired during tACS or sham stimulation. All other blocks (light grey) were  
726 measured in absence of stimulation. Functional maps were averaged over subjects and pro-  
727 jected onto a MNI standard surface. Only activity within the analyzed ROI is depicted. A  
728 strong facilitation of event-related power modulation around the IAF can be observed during  
729 tACS application (block 2 and 3).

730

731 **Figure 5: Artifact-to-brain-signal topographies.** Topographies depict the average ratio  
732 between participants' pre-stimulus alpha power estimated during the baseline block and re-  
733 sidual artifact in the pre-stimulus interval during block 2 (**top row**) and 3 (**bottom row**). Re-  
734 sults are depicted only for the stimulation group. The ratio is strongest in central areas cov-  
735 ered by stimulation electrodes and cables. Frontal and posterior areas within the ROI seem  
736 less affected. Here, the ratio falls in a physiologically plausible range ( $< 1:3/1:4$ ), such that  
737 residual artifact and facilitatory effects of the stimulation or spontaneous increase of alpha  
738 power cannot be disentangled. Results have to be interpreted in terms of an upper boundary  
739 for the size of the residual artifact, as each virtual channel contains a mixture of brain signal  
740 of interest and artifact.

741

742 **Figure 6: Event-related artifact envelope. (A)** Topography and time course of the artifact  
743 envelope around stimulus onset in gradiometer sensors. Topographies represent the ampli-  
744 tude difference of the envelope around the stimulation frequency between the reference (-2.5  
745 to -0.5 sec) and the testing period (0 to 2 sec). Bold sensors mark locations in which this dif-

746 ference was significant. Data of the sham group is depicted for comparison and reflects the  
747 task-related modulation of endogenous alpha oscillations (visible shortly after stimulus onset,  
748 vertical black bar at 0 sec) as no stimulation artifact was introduced to the data. Envelope  
749 epochs of all subjects were demeaned before averaging to enhance comparability of the en-  
750 velope modulation. Shaded areas depict standard error of the mean (*S.E.M.*). Gradiometer  
751 time-courses are strongly dominated by rhythmic modulation around 1 Hz – 2 Hz that poten-  
752 tially reflects a technical artifact in this sensor type. **(B)** Correlation between event-related  
753 modulation of the artifact envelope in gradiometer sensors and event-related alpha power  
754 modulation within the ROI after beamforming. The absence of a significant (or even moder-  
755 ately high) correlation in the stimulation group provides supporting evidence that the effects  
756 observed in source-space are not driven by systematic event-related modulations of tACS  
757 artifact strength. **(C)** Topography and time course of the artifact envelope around stimulus  
758 onset in magnetometer sensors. **(D)** Correlation between event-related modulation of the  
759 artifact envelope in magnetometers and alpha power modulation within ROI after beamform-  
760 ing. Similar to the gradiometer data, no correlation between source-level effects and artifact  
761 tACS artifact modulation was observed.

762

763

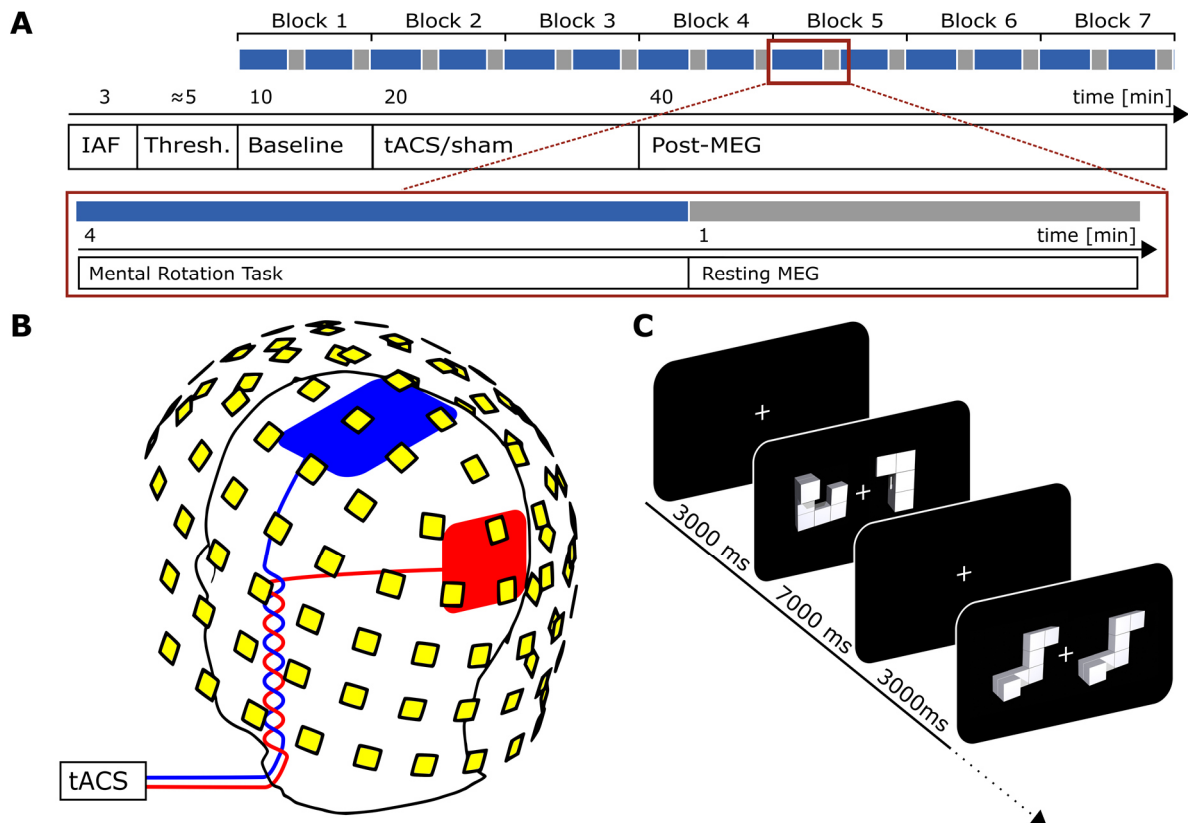

764

765

Figure 1

766

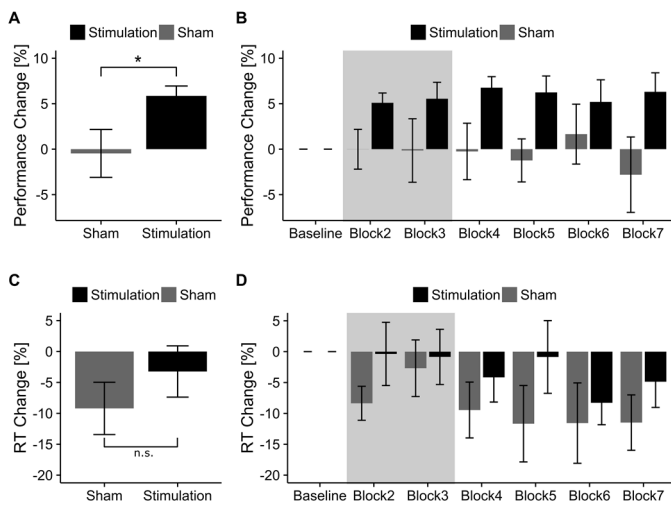

767

768

Figure 2

769

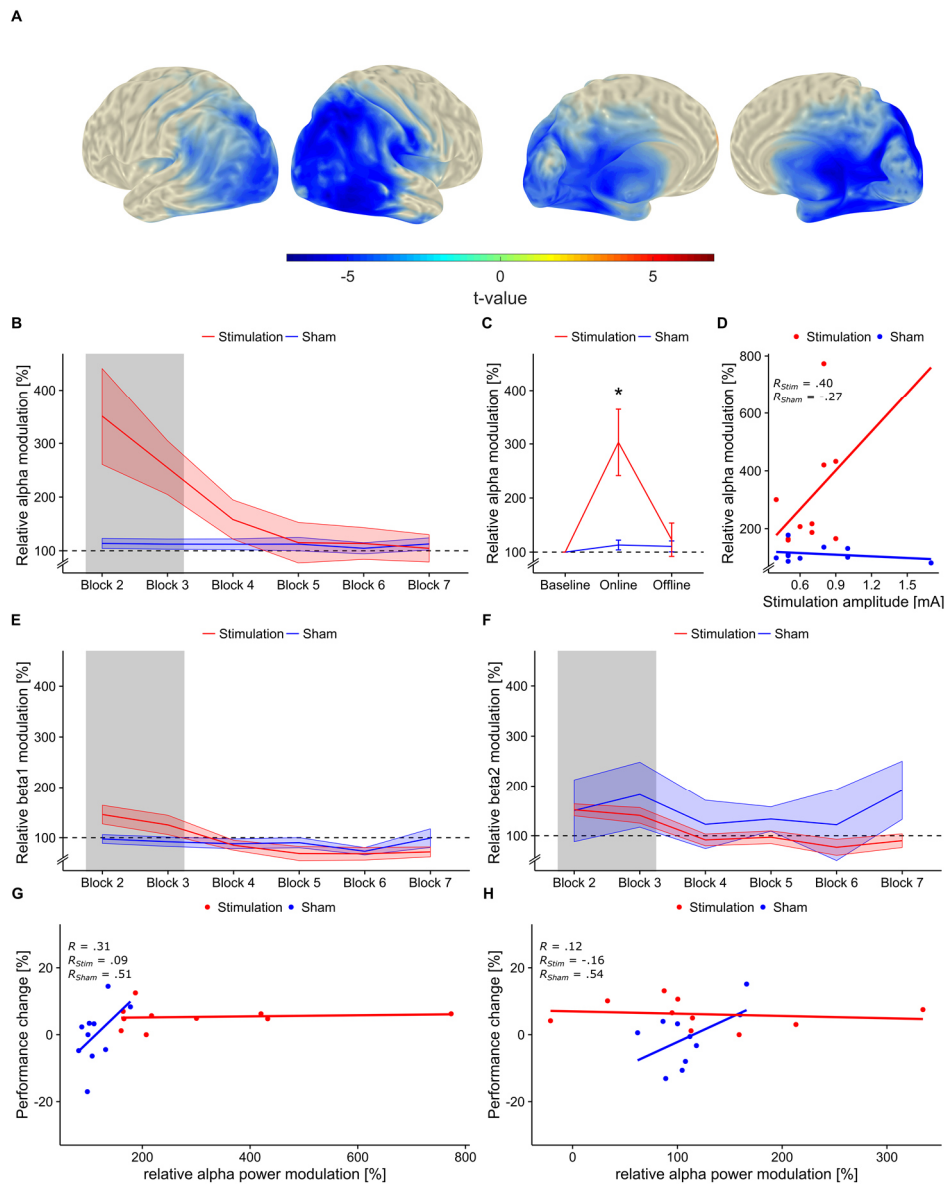

Figure 3

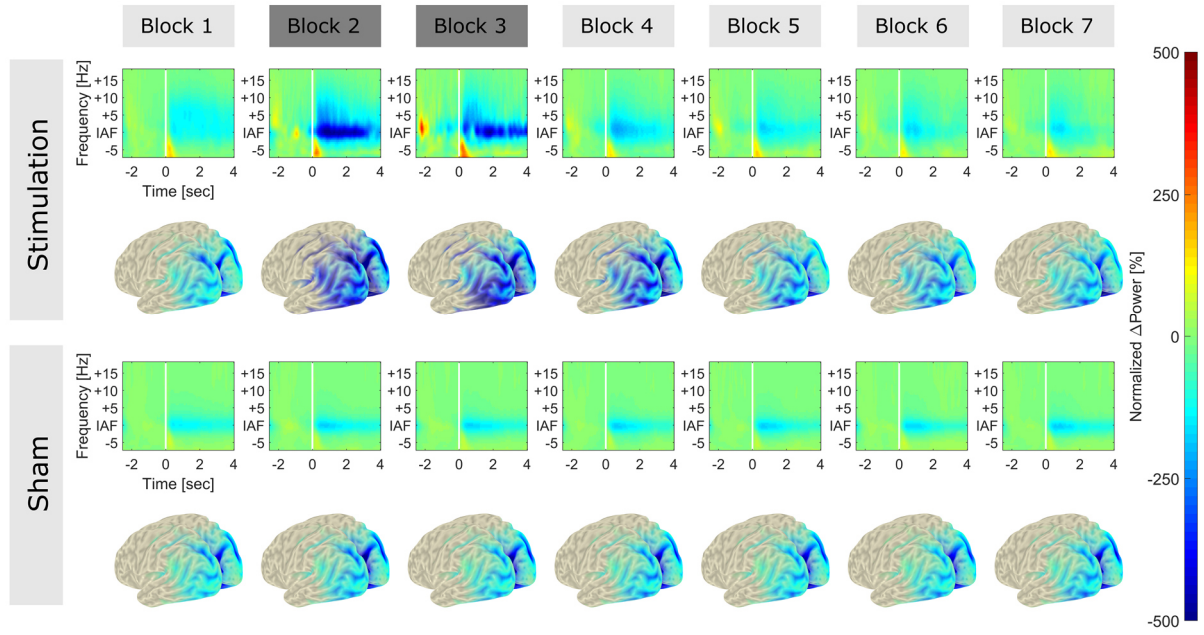

772

773

Figure 4

774

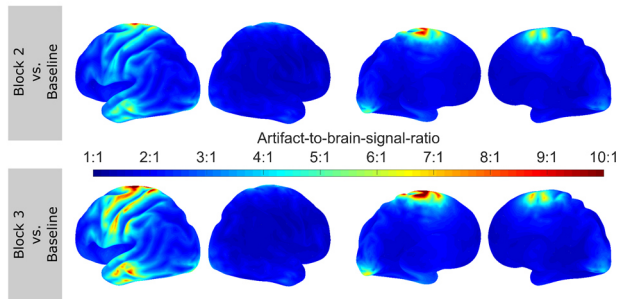

775

776

Figure 5

777



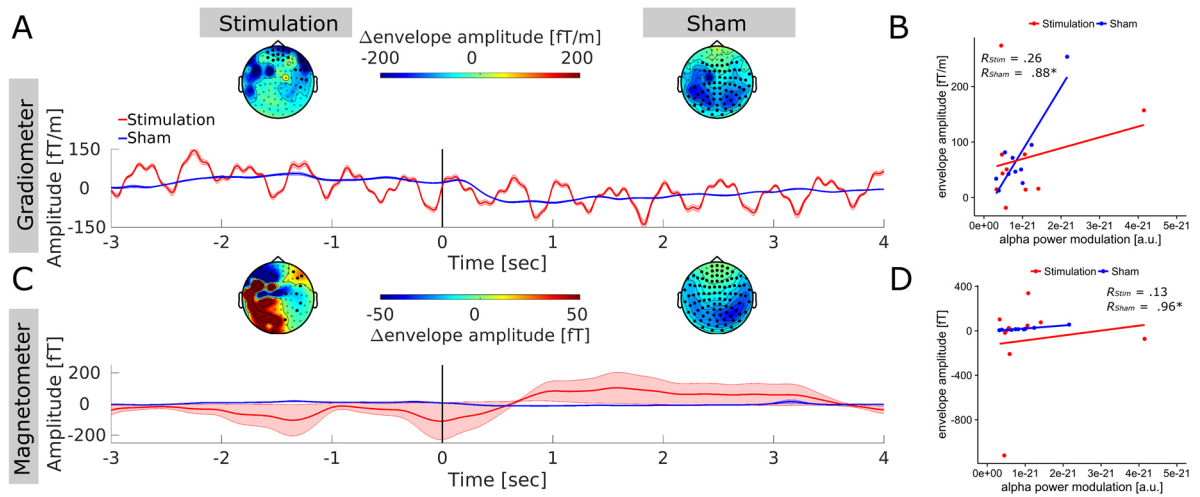

778

779

Figure 6
